# Supplementary material for: Biofabrication of Poly(glycerol sebacate) Scaffolds Functionalized with a Decellularized Bone Extracellular Matrix for Bone Tissue Engineering
Source: MDPI journal article supplement (doi:10.3390/bioengineering10010030), 2022-12-25
Supplement: s1 [file s1]

Supporting Information Supplement Figure S1:

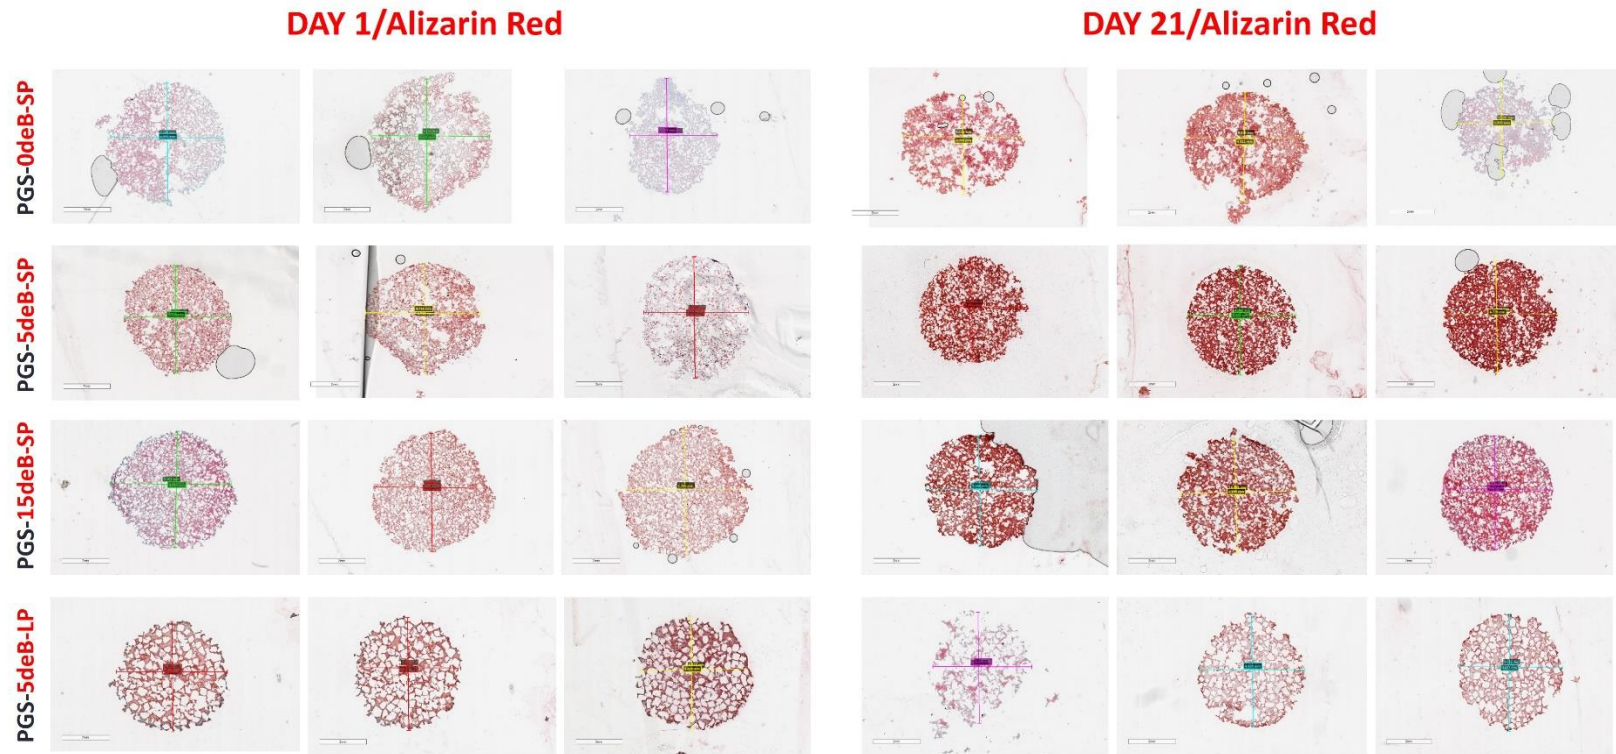

**SF1.** In-vitro degradation by size measurements via alizarin red staining of whole scaffold at day 1 and day 21 (n=3). Aperio ImageScope were used to determine the bilateral diameter of the whole scaffold.

Supplement Figure S2:

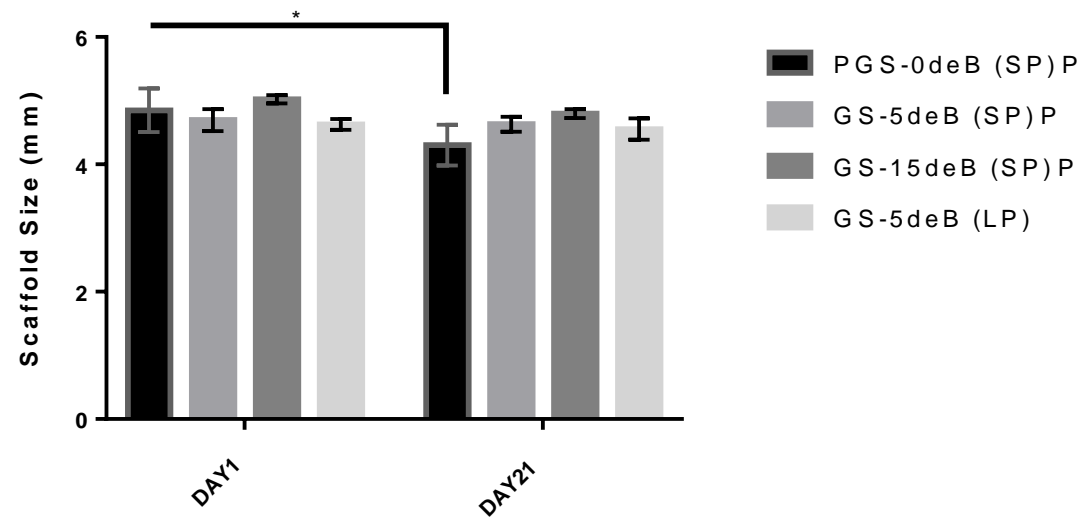

**SF2.** In-vitro degradation by size following 21 days culture period obtained via histological staining of whole scaffold (SF1 above) at day 1 and day 21 (n=3), \* = statistical significance via two-way ANOVA multiple comparisons between each scaffold with its former day point.
